# Supplementary material for: Gene expression in Tribolium castaneum life stages: Identifying a species-specific target for pest control applications
Source: PeerJ journal article supplement (doi:10.7717/peerj.6946), 2019-05-23

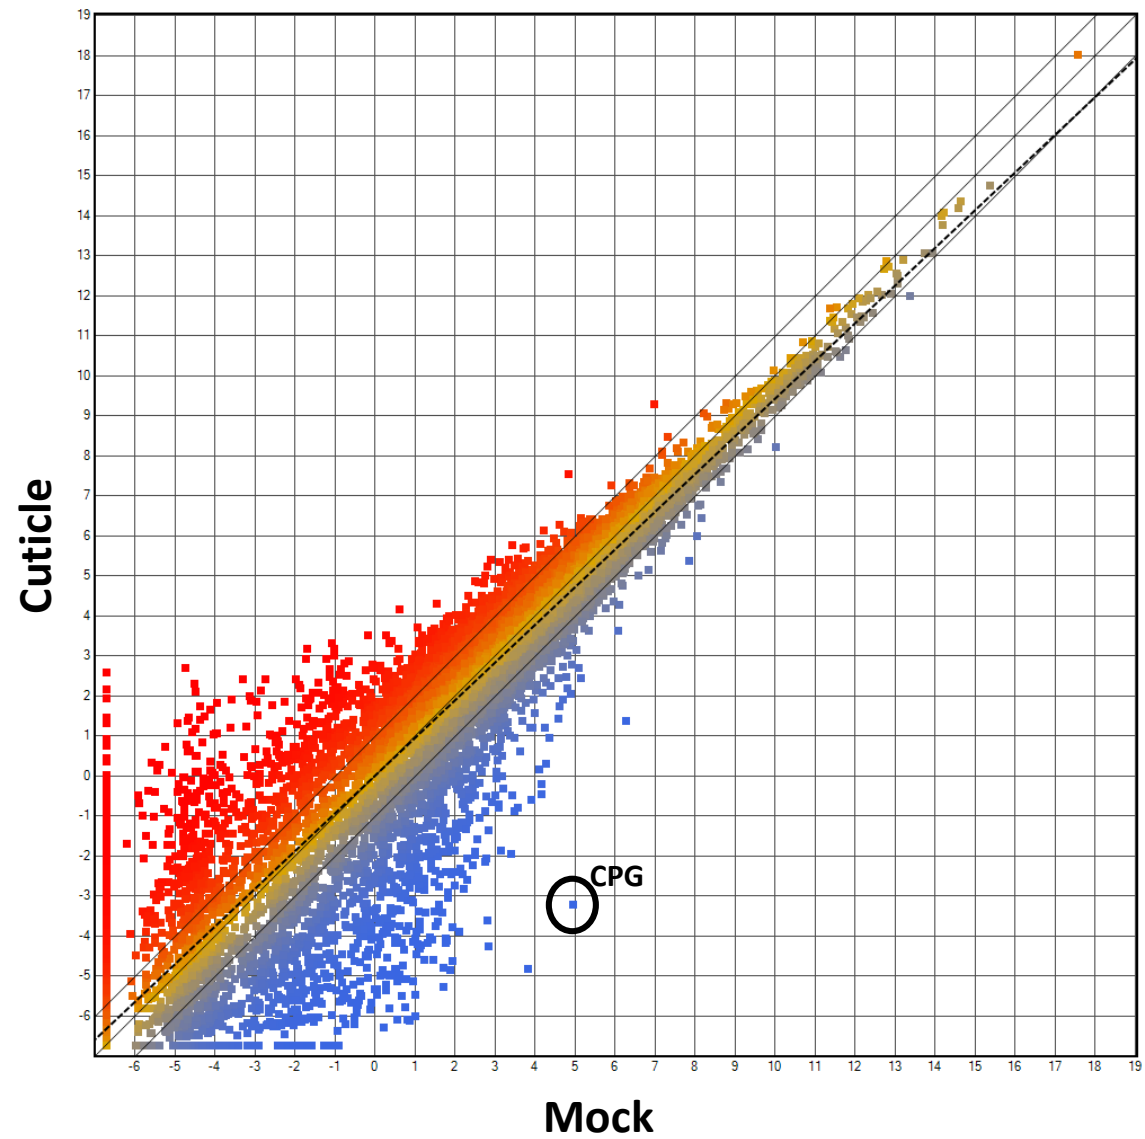

Supplement: Suppl_Fig_2.pdf [file Suppl_Fig_2.pdf]
